# Supplementary material for: A simplified and cost-effective detection of cancer bio-markers using BODIPY and surfactant-templated fluorogenic self-assembly
Source: Royal Society of Chemistry journal article supplement (doi:10.1039/d3nj04380k), 2023-01-01
Supplement: d3nj04380k1.pdf [file d3nj04380k1.pdf]

***Supplementary information***

**A simplified and cost-effective detection of cancer bio-marker  
using BODIPY and surfactant templated fluorogenic self-  
assembly**

Soumyadeep Sarkar<sup>a, b</sup>, Sudip Gorai<sup>c, d</sup>, Akhilesh Potnis<sup>e</sup>, Padma Nilaya Jonnalagadda<sup>a, d</sup>,  
Soumyaditya Mula<sup>c, d</sup>, Goutam Chakraborty<sup>a\*</sup>

<sup>a</sup>Laser and Plasma Technology Division, Bhabha Atomic Research Centre, Mumbai-400085,

<sup>b</sup>On summer internship from IISER-K (Indian Institute of Science Education and Research, Kolkata),  
Campus Road, Mohanpur-741246, India.

<sup>c</sup>Bio-organic Division, Bhabha Atomic Research Centre, Mumbai-400085, India.

<sup>d</sup>Homi Bhabha National Institute, Anushaktinagar, Mumbai-400094, India.

<sup>e</sup>Molecular Biology Division, Bhabha Atomic Research Centre, Mumbai-400085, India.

**Corresponding author:** Goutam Chakraborty<sup>a\*</sup>

<sup>a</sup>Laser and Plasma Technology Division, Bhabha Atomic Research Centre, Mumbai-400085,  
India.

E-mail: [gchak@barc.gov.in](mailto:gchak@barc.gov.in) (GC).

| S.N. | Table of content                                                                                                                                                                                                     | Page  |
|------|----------------------------------------------------------------------------------------------------------------------------------------------------------------------------------------------------------------------|-------|
| 1    | <b>Experimental Section</b>                                                                                                                                                                                          | S3-S4 |
| 2    | <b>Figure S1.</b> Normalized absorption spectra of BDP-Sty in EtOH (red) and in buffer solution containing 5 mM SDS (green).                                                                                         | S5    |
| 3    | <b>Figure S2.</b> Normalized absorption spectra of BDP-Sty@SDS complex (3 $\mu$ M BDP-Sty+0.6 mM SDS) at 0 (black) and 632.6 mM (green) of NaCl in 5 mM phosphate buffer at pH 7.                                    | S5    |
| 4    | <b>Figure S3.</b> Emission spectra of 3 $\mu$ M BDP-Sty at different combination in 5 mM phosphate buffer at pH 7.                                                                                                   | S6    |
| 5    | <b>Figure S4.</b> Emission spectra of BDP-Sty@PSS complex (3 $\mu$ M BDP-Sty+2.5 $\mu$ M PSS at (1) 0, (2) 14.5, (3) 29.0, (4) 43.4, (5) 57.7, and (6) 71.9 $\mu$ M of Sp in 5 mM phosphate buffer at pH 7.          | S6    |
| 6    | <b>Figure S5.</b> Emission spectra of BDP-Sty@CTAB complex (3 $\mu$ M BDP-Sty+0.6 mM CTAB) at (1) 0, (2) 14.5, (3) 29.0, (4) 57.7, (5) 86.5, (6) 115.0 and (7) 169.6 $\mu$ M of Sp in 5 mM phosphate buffer at pH 7. | S7    |
| 7    | <b>Figure S6.</b> Emission spectra of BDP@SDS complex (3 $\mu$ M BDP+0.6 mM SDS) at (1) 0, (2) 5.1, (3) 10.2, (4) 15.2, (5) 20.2 and (6) 25.2 $\mu$ M spermine in 5 mM phosphate buffer at pH 7.                     | S7    |
| 8    | <b>Figure S7.</b> Size distribution of BDP-Sty@SDS@Sp ternary complex particles obtained from AFM study.                                                                                                             | S8    |
| 9    | <b>Figure S8.</b> TEM image of BDP-Sty@SDS@Sp ternary complex particles obtained from AFM study.                                                                                                                     | S8    |
| 10   | <b>Figure S9.</b> Schematic presentation of spermine detection by BDP-Sty@SDS binary complex.                                                                                                                        | S9    |
| 11   | <b>Table S1.</b> Quantum yield of BDP-Sty at different condition.                                                                                                                                                    | S9    |
| 12   | <b>Table S2.</b> Different optical probes used for spermine detection.                                                                                                                                               | S10   |
| 13   | <b>References</b>                                                                                                                                                                                                    | S11   |

## 1. Experimental Section

### A. Photophysical studies

All the UV-Vis and fluorescence spectroscopic studies were performed in UV-2700 spectrophotometer (Shimadzu, Japan) and Fluoromax-4 spectrofluorimeter (Horiba) respectively, taking the sample solutions in a quartz cuvette of 10 mm x 10 mm path length. Since, the change in absorbance for the dye at ~605 nm is significantly small during complexation process; in steady-state emission measurements all the sample solutions were excited at ~605 nm to mitigate any distortion in emission output. Temperature was kept constant (~25 °C) during all the spectroscopic investigations.

### B. Dynamic light scattering (DLS)

Particle size analyzer (Model: SZ-100, Horiba, Japan) with a solid-state laser (532 nm wavelength and 10 mW power) pumped by diode, was utilized for the DLS measurements. The scattered light falling at an angle of 173° on a photomultiplier provided the required signal. The measurements were carried out at least five successive times to have an average size of the aggregated particles. With the help of Stokes-Einstein's equation, hydrodynamic diameter ( $d_h$ ) for the particles was evaluated, where,  $D = k_B T / 3\pi\eta d_h$  (where,  $k_B$  = Boltzman Constant,  $T$  = absolute temperature,  $D$  = diffusion coefficient,  $\eta$  = viscosity of solvent).

### C. Atomic force microscopy (AFM)

Atomic Force Microscope (obtained from NTMDT Ntegra) was used to obtain AFM image of the BDP-Sty@SDS@Sp complex. The sample solution (10  $\mu$ L) was spotted on a freshly cleaved mica plate of 1 cm x 1 cm dimension, attached to a sapphire substrate, and then gradually dried under an infrared lamp for ~30 minutes. The same was then placed on the sample holder of the AFM. Semi-contact mode was used to scan the mica surface with NSG11 golden silicon probe tip using a 100-micron scanner attached with a SMENA head. Measurements were done across X-Y-Z axis with the help of NTMDT NOVA 1.1.01780 software and which also measured the height of 50 randomly selected BDP-Sty@SDS@Sp particles using arbitrary height measurement tool.

#### D. Transmission electron microscopy (TEM)

For TEM, 10  $\mu\text{L}$  of freshly prepared ternary complex, BDP-Sty@SDS@Sp was spotted on a carbon coated (Carbon Type-B, 200 mesh) Cu grid and then evaporated under infra-red lamp for about 45 minutes to make it completely dry. After that it was subjected to TEM study under transmission electron microscope (TEM) of Zeiss-Carl (Libra-120) at an accelerating voltage of 120 kV.

#### E. Calculation of limit of detection

Limit of detection (LOD) =  $3\sigma/S$

where,  $\sigma$  = standard deviation, obtained from 10 successive fluorescence measurements of BDP-Sty@SDS binary complex (as blank) in buffer or in 20% urine or 0.5% human serum at  $\lambda_{\text{ex}} = 605$  nm and S = slope of the calibration curve, obtained from the change in fluorescence intensity of the BDP-Sty@SDS binary complex as a function of spermine concentration.

#### F. Calculation of quantum yield ( $\Phi$ )

Quantum yield of BDP-Sty in the form of free, binary (BDP-Sty@SDS) and ternary complex (BDP-Sty@SDS@Sp) were calculation using the following equation:

$$\frac{\Phi_{\text{Sam}}}{\Phi_{\text{Std}}} = \frac{FA_{\text{Sam}}}{FA_{\text{Std}}} \times \frac{OD_{\text{Std}}}{OD_{\text{sam}}} \times \frac{\eta_{\text{Sam}}^2}{\eta_{\text{Std}}^2}$$

Where,  $\Phi_{\text{Sam}}$  = Quantum yield of the species to be determined.

$\Phi_{\text{Std}}$  = Quantum yield of the standard = 0.04 for BDP-Sty in MeOH.<sup>1</sup>

$FA_{\text{sam}}$  and  $OD_{\text{sam}}$  are the area under the fluorescence curve and optical density of the sample, respectively.

$FA_{\text{std}}$  and  $OD_{\text{std}}$  are the area under the fluorescence curve and optical density of the standard, respectively.

$\eta_{\text{sam}}$  = Refractive index of the medium of the sample = 1.333 (for aqueous medium)

$\eta_{\text{std}}$  = Refractive index of the medium of the standard = 1.328 (for MeOH).

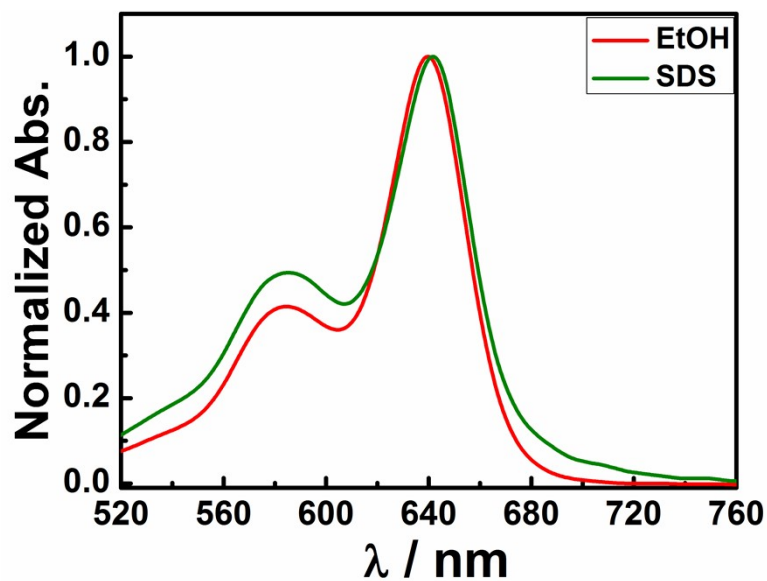

**Figure S1.** Normalized absorption spectra of BDP-Sty in EtOH (red) and in buffer solution containing 5 mM SDS (green).

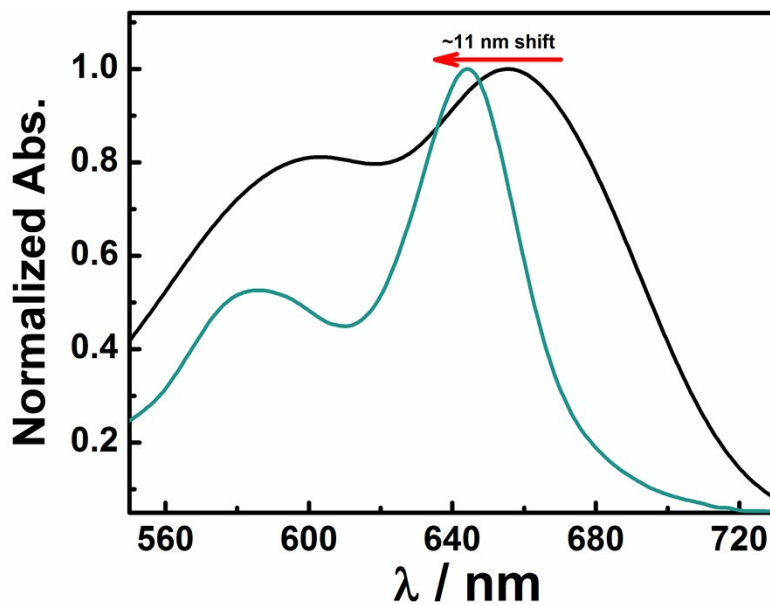

**Figure S2.** Normalized absorption spectra of BDP-Sty@SDS complex (3  $\mu$ M BDP-Sty+0.6 mM SDS) at 0 (black) and 632.6 mM (green) of NaCl in 5 mM phosphate buffer at pH 7.

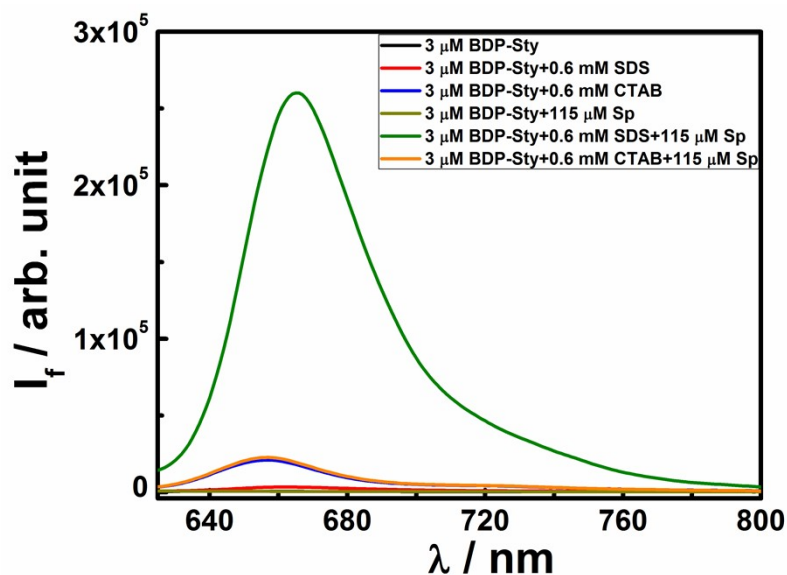

**Figure S3.** Emission spectra of 3  $\mu\text{M}$  BDP-Sty at different combination in 5 mM phosphate buffer at pH 7.  $\lambda_{\text{ex}} = 605$  nm.

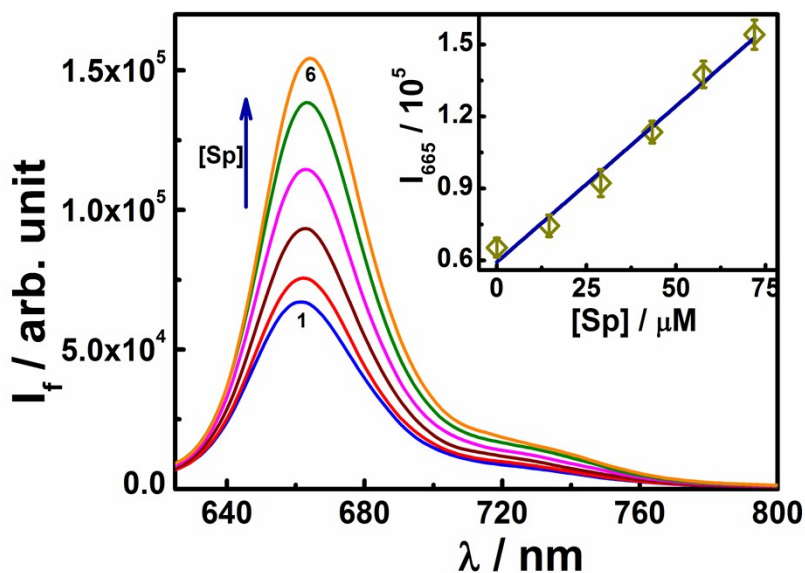

**Figure S4.** Emission spectra of BDP-Sty@PSS complex (3  $\mu\text{M}$  BDP-Sty+2.5  $\mu\text{M}$  PSS at (1) 0, (2) 14.5, (3) 29.0, (4) 43.4, (5) 57.7, and (6) 71.9  $\mu\text{M}$  of Sp in 5 mM phosphate buffer at pH 7. **Inset:** Linear fit of intensity change of BDP-Sty@PSS complex with increasing spermine concentration. Linear regression is

$I_{665} = 1.3 \times 10^3 [\text{Sp}/\mu\text{M}] + 59365.2$ ;  $R^2 = 0.982$ ,  $\text{LOD} \sim 1.68 \mu\text{M}$ , standard deviation ( $\sigma$ ) = 730.2.  $\lambda_{\text{ex}} = 605$  nm.

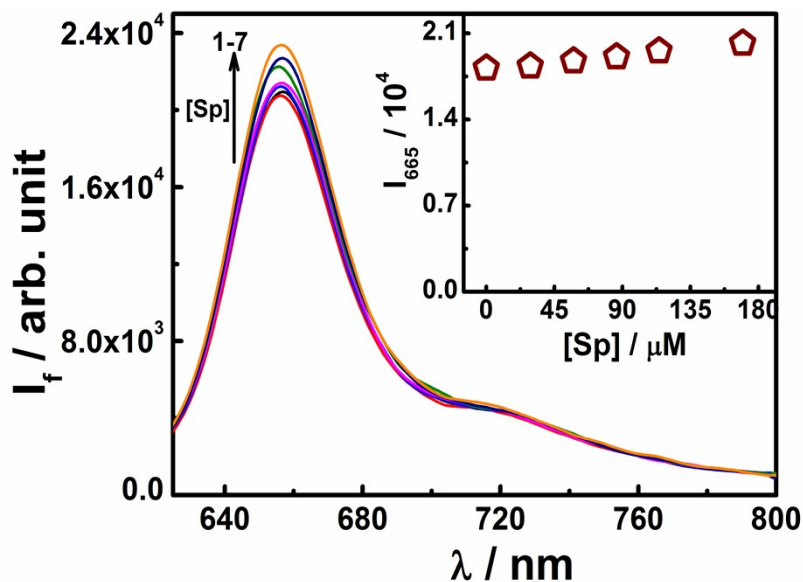

**Figure S5.** Emission spectra of BDP-Sty@CTAB complex (3  $\mu\text{M}$  BDP-Sty+0.6 mM CTAB) at (1) 0, (2) 14.5, (3) 29.0, (4) 57.7, (5) 86.5, (6) 115.0 and (7) 169.6  $\mu\text{M}$  of Sp in 5 mM phosphate buffer at pH 7.  $\lambda_{\text{ex}} = 605$  nm.

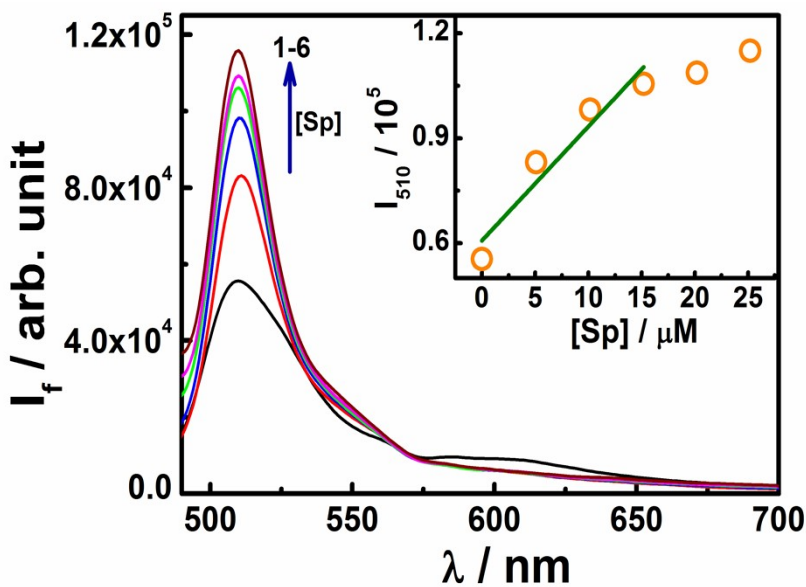

**Figure S6.** Emission spectra of BDP@SDS complex (3  $\mu$ M BDP+0.6 mM SDS) at (1) 0, (2) 5.1, (3) 10.2, (4) 15.2, (5) 20.2 and (6) 25.2  $\mu$ M spermine in 5 mM phosphate buffer at pH 7.  $\lambda_{\text{ex}}$  = 470 nm.

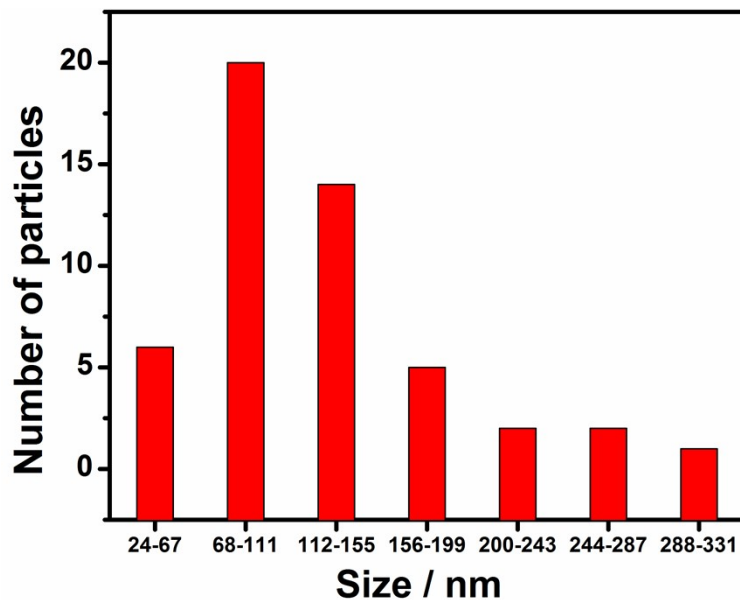

**Figure S7.** Size distribution of BDP-Sty@SDS@Sp ternary complex particles obtained from AFM study.

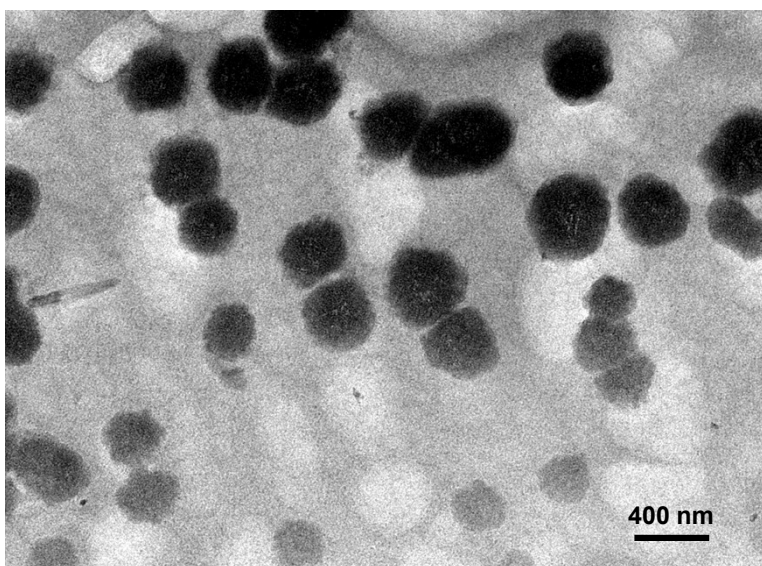

**Figure S8.** TEM image of BDP-Sty@SDS@Sp ternary complex particles obtained from AFM study.



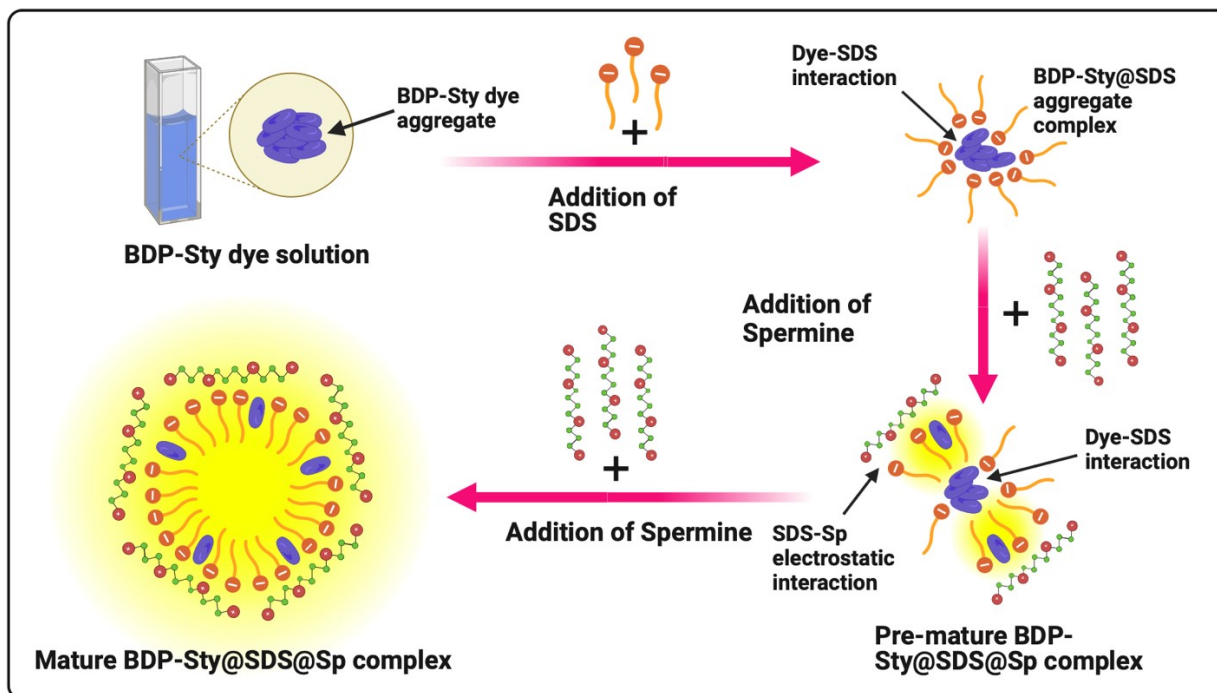

**Figure S9.** Schematic presentation of spermine detection by BDP-Sty@SDS binary complex.

**Table S1.** Quantum yield of BDP-Sty at different condition. Quantum yield ( $\Phi$ ) = 0.04 for BDP-Sty in MeOH has been taken as reference quantum yield for calculation.<sup>1</sup>

| Species                  | $\Phi$               |
|--------------------------|----------------------|
| BDP-Sty in MeOH          | 0.04                 |
| BDP-Sty in buffer        | $8.6 \times 10^{-5}$ |
| BDP-Sty@SDS in buffer    | $1.2 \times 10^{-4}$ |
| BDP-Sty@SDS@Sp in buffer | 0.004                |

**Table S2.** Different optical probes used for spermine detection.

| S.N. | Probes                                                                            | Dynamic Range                                                                                      | Limit of detection (LOD)                                                                      | Reference        |
|------|-----------------------------------------------------------------------------------|----------------------------------------------------------------------------------------------------|-----------------------------------------------------------------------------------------------|------------------|
| 1.   | Metal-mediated ethynylarene                                                       | 25 $\mu\text{M}$ – 2.5 mM                                                                          | 25 $\mu\text{M}$                                                                              | 2                |
| 2.   | Mixture of anionic pyrocatechol violet (PV) and 3-carboxyphenylboronic acid (CPB) | 1–10 $\mu\text{M}$                                                                                 | 6.24 $\mu\text{M}$                                                                            | 3                |
| 3.   | Hydrogel CB@AG                                                                    | 6 $\mu\text{M}$ –2.5 mM                                                                            | 6 $\mu\text{M}$                                                                               | 4                |
| 4.   | POC12-SQ Complex                                                                  | 20–100 $\mu\text{M}$                                                                               | 4.73 $\mu\text{M}$                                                                            | 5                |
| 5.   | Carboxylic acid-functionalized polyfluorene (PFCOOH-BT5)                          | 0–20 $\mu\text{M}$                                                                                 | 2 $\mu\text{M}$                                                                               | 6                |
| 6.   | Supramolecular Hydrogel Hybrid of G-coum $\subset$ MMT                            | 20–100 $\mu\text{M}$                                                                               | 1.4 $\mu\text{M}$                                                                             | 7                |
| 7.   | Selective AIE-CB7 based fluorescent probes                                        | 0–12 $\mu\text{M}$                                                                                 | 1.0 $\mu\text{M}$                                                                             | 8                |
| 8.   | Tetraphenylethylene derivative based probe                                        | 1–31 $\mu\text{M}$                                                                                 | 0.7 $\mu\text{M}$                                                                             | 9                |
| 9.   | Self-assemblies ENS-1 and ENS- 2                                                  | 0–2.5 $\mu\text{M}$ and 0–20 $\mu\text{M}$                                                         | 6 nM and 0.5 $\mu\text{M}$                                                                    | 10               |
| 10.  | Ciprofloxacin-Tb <sup>3+</sup> complex                                            | 2–180 $\mu\text{M}$                                                                                | 0.17 $\mu\text{M}$                                                                            | 11               |
| 11.  | BDP-Sty@SDS assembly                                                              | 0–75 $\mu\text{M}$ in buffer, 0–96 $\mu\text{M}$ in 50% urine and 0–66 $\mu\text{M}$ in 0.5% serum | 65.6 nM in buffer, 1.79 $\mu\text{M}$ in 50% urine and 2.38 $\mu\text{M}$ in 0.5% human serum | <b>This work</b> |

## References:

1. S. Gorai, S. Mula, P. N. Jonnalgadda, B. S. Patro and G. Chakraborty, *Talanta*, 2023, **265**, 124915.
2. J. T. Fletcher and B. S. Bruck, *Sens. Actuators, B*, 2015, **207**, 843-848.
3. Y. Fukushima and S. Aikawa, *Microchem. J.*, 2021, **162**, 105867.
4. R. R. Nair, S. Debnath, S. Das, P. Wakchaure, B. Ganguly and P. B. Chatterjee, *ACS Appl. Bio Mater.*, 2019, **2**, 2374-2387.
5. J. Tu, S. Sun and Y. Xu, *Chem. Commun.*, 2016, **52**, 1040–1043.
6. B. Bao, L. Yuwen, X. Zheng, L. Weng, X. Zhu, X. Zhan and L. Wang, *J. Mater. Chem.*, 2010, **20**, 9628-9634.
7. M. Ikeda, T. Yoshii, T. Matsui, T. Tanida, H. Komatsu and I. Hamachi, *J. Am. Chem. Soc.*, 2011, **133**, 1670-1673.
8. G. Jiang, W. Zhu, Q. Chen, X. Li, G. Zhang, Y. Li, X. Fan and J. Wang, *Sens. Actuators, B*, 2018, **261**, 602-607.
9. M. Barros, S. Ceballos, P. Arroyo, J. A. Sáez, M. Parra, S. Gil, A. M. Costero and P. Gaviña, *Chemosensors*, 2022, **10**, 8.
10. N. Tripathi, P. Singh, V. Luxami, D. Mahajan and S. Kumar, *Sens. Actuators, B*, 2018, **270**, 552-561.
11. N. Ngoc Nghia, B. The Huy, P. Thanh Phong, J. S. Han, D. H. Kwon and Y.-I. Lee, *PLoS ONE*, 2021, **16**, e0251306.
